1

2 **Integrative analysis of transcriptomic and clinical data**

3 **uncovers the tumor suppressive activity of MITF in**

4 **prostate cancer**

5

6 Lorea Valcarcel-Jimenez<sup>1</sup>, Alice Macchia<sup>1</sup>, Natalia Martín-Martín<sup>1, 2</sup>, Ana Rosa Cortazar<sup>1, 2</sup>,

7 Ariane Schaub-Clerigué<sup>1</sup>, Mikel Pujana-Vaquerizo<sup>1</sup>, Sonia Fernández-Ruiz<sup>1</sup>, Isabel Lacasa-

8 Viscasillas<sup>3</sup>, Aida Santos-Martin<sup>3</sup>, Ana Loizaga-Iriarte<sup>3</sup>, Miguel Unda-Urzaiz<sup>3</sup>, Ivana

9 Hermanova<sup>1</sup>, Ianire Astobiza<sup>1</sup>, Mariona Graupera<sup>4</sup>, Julia Starkova<sup>5</sup>, James Sutherland<sup>1</sup>, Rosa

10 Barrio<sup>1</sup>, Ana M. Aransay<sup>1, 6</sup>, Arkaitz Carracedo<sup>1, 2, 7, 8</sup> and Verónica Torrano<sup>1, 2, 9</sup>

11 <sup>1</sup>CIC bioGUNE, Bizkaia Technology Park, 801<sup>a</sup> bld., 48160 Derio, Bizkaia, Spain.

12 <sup>2</sup>CIBERONC.

13 <sup>3</sup>Department of Urology, Basurto University Hospital, 48013 Bilbao, Spain

14 <sup>4</sup>Vascular Signalling Laboratory, Institut d'Investigació Biomèdica de Bellvitge (IDIBELL), Gran Via de l'Hospitalet 199-203.

15 <sup>5</sup>CLIP-Childhood Leukaemia Investigation Prague, Charles University, Prague, Czech Republic; Second Faculty of Medicine,  
16 Charles University, Prague, Czech Republic; University Hospital Motol, Prague, Czech Republic.

17 <sup>6</sup>Centro de Investigación Biomédica en Red de Enfermedades Hepáticas y Digestivas (CIBERehd).

18 <sup>7</sup>Ikerbasque, Basque foundation for science, 48011 Bilbao, Spain.

19 <sup>8</sup>Biochemistry and Molecular Biology Department, University of the Basque Country (UPV/EHU), P. O. Box 644, E-48080  
20 Bilbao, Spain.

21 <sup>9</sup>Correspondence to: Verónica Torrano, [vtorrano@cicbiogune.es](mailto:vtorrano@cicbiogune.es). Telephone number: 0034-944061326. Fax number: 0034-  
22 944061301

23

24 The authors declare no conflict of interest.

## 25 **Abstract**

26 The dysregulation of gene expression is an enabling hallmark of cancer. Computational analysis of  
27 transcriptomics data from human cancer specimens, complemented with exhaustive clinical annotation,  
28 provides an opportunity to identify core regulators of the tumorigenic process. Here we exploit well-  
29 annotated clinical datasets of prostate cancer for the discovery of transcriptional regulators relevant to  
30 prostate cancer. Following this rationale, we identify Microphthalmia-associated transcription factor  
31 (MITF) as a prostate tumor suppressor among a subset of transcription factors. Importantly, we further  
32 interrogate transcriptomics and clinical data to refine MITF perturbation-based empirical assays and  
33 unveil Crystallin Alpha B (CRYAB) as an unprecedented direct target of the transcription factor that is,  
34 at least in part, responsible for its tumor suppressive activity in prostate cancer. This evidence was  
35 supported by the enhanced prognostic potential of a signature based on the concomitant alteration of  
36 MITF and CRYAB in prostate cancer patients. In sum, our study provides proof-of-concept evidence of  
37 the potential of the bioinformatics screen of publicly available cancer patient databases as discovery  
38 platforms, and demonstrates that the MITF-CRYAB axis controls prostate cancer biology.

39

## 40 Introduction

41 Balanced integration of intracellular circuits operates within a normal cell to sustain physiological  
42 homeostasis. Alterations in some, if not all, of these circuits converge in changes on gene expression,  
43 which will eventually enable the acquisition and sustenance of the hallmarks of cancer cells (1). This  
44 event emphasizes the importance of maintaining the transcriptional homeostasis in normal cells and  
45 places gene expression deregulation at the core of cancer research interests.

46 In the last decades, transcriptomics data derived from cancer specimens has become an important  
47 resource for the classification, stratification and molecular driver identification in tumors. We and others  
48 have demonstrated that deregulation of gene expression is a key node for cancer pathogenesis and  
49 progression (2-6). Prostate cancer (PCa) research exemplifies the effort in deciphering the genomics  
50 and transcriptomics landscape of tumors, and extremely valuable data has been generated (7-13). In  
51 spite of the public availability of these relevant data, they are still underexploited by the scientific  
52 community to understand PCa biology. In this regard, the computational tools and dataset selection  
53 strategies to carry out these studies are a bottleneck for the cancer research field.

54 By combining integrated-bioinformatics screening of clinically relevant PCa datasets with *in vivo* and *in*  
55 *vitro* molecular biology assays, we have recently described the metastasis suppressor activity of  
56 Peroxisome proliferator-activated receptor  $\gamma$  (PPAR $\gamma$ ) coactivator alpha (PGC1 $\alpha$ ) (14, 15). This  
57 transcriptional coactivator is a major regulator of mitochondrial biogenesis and function, and has an  
58 inherent capacity to integrate environmental signals and cellular energetic demands. This ability  
59 empowers PGC1 $\alpha$  to be a driver in shaping responses to metabolic stress during different physiologic  
60 and tumorigenic processes (16). As might be expected due to its fundamental role in normal and cancer  
61 scenarios, the regulation of PGC1 $\alpha$  expression, from the genomic to the protein level, is complex and  
62 dynamic (17). At the level of mRNA expression, one of the well-defined direct regulators of PGC1 $\alpha$  is  
63 the Microphthalmia-associated transcription factor (MITF) (18).

64 MITF is a basic helix-loop-helix leucine zipper (bHLHZIP) transcription factor that regulates the  
65 expression of lineage commitment programs that are essential for propagation of the melanocyte

66 lineage (19). The existence of different MITF transcript variants is the result of both alternative splicing  
67 and promoter activation that results in the cell-type-specific expression of the different MITF isoforms  
68 (A, CX, MC, C, E, H, D, B, M, J) (20). The melanoma specific isoform M-MITF is the best studied isoform  
69 and, despite some controversy, its expression is generally deregulated in melanoma. Although MITF  
70 alone cannot act as a classical oncogene, it has been called a 'lineage survival oncogene' for melanoma  
71 (19, 21). Importantly, the presence or absence of the M-MITF- PGC1 $\alpha$  regulatory axis has stratification  
72 potential in melanoma and informs on the efficacy of BRAF inhibitor treatments (18, 22). Although the  
73 expression of MITF has been detected in other types of tumors different from melanoma (23, 24), its  
74 active role in the progression of these diseases, including PCa, remains unexplored.

75 Crystallin Alpha-B (CRYAB) is a ubiquitous small heat shock protein that is expressed in response to a  
76 wide range of physiological and non-physiological conditions preventing aggregations of denatured  
77 proteins. In a wide variety of tumor types CRYAB has been found to be overexpressed and associated  
78 with disease progression (25-29) and poor prognosis (30, 31). However, in PCa and nasopharyngeal  
79 cancers CRYAB expression is decreased (32, 33), pointing at possible tumor suppressive activity of  
80 CRYAB in these cancer scenarios.

81 In the present study, by combining an exhaustive interrogation of seven publically available prostate  
82 cancer databases with refined empirical assays, we have identified MITF as a prostate tumor  
83 suppressor. In addition, we have unveiled CRYAB as a novel direct target of the transcription factor that  
84 is, at least in part, responsible for its tumor suppressive activity in prostate cancer. Importantly, the  
85 tumor suppressive role for this novel MITF-CRYAB axis is supported by the enhanced prognostic  
86 potential of a signature based on the concomitant alteration of both genes in PCa patients.

## 87 **Results**

### 88 **Bioinformatics screening identifies MITF as a transcription factor altered in prostate cancer**

89 We have recently demonstrated that the reduced expression of the transcriptional co-activator PGC1 $\alpha$   
90 is a causal event for metastatic prostate cancer (PCa) (14). We sought to identify transcriptional  
91 regulators related to the alteration in PGC1 $\alpha$  expression. We designed a bioinformatics strategy based  
92 on the analysis of 16 genes directly linked to the regulation of *PGC1A* gene (17, 22, 34-38), in order to  
93 identify transcription factors that could be relevant to PCa biology. For the candidate screen we applied  
94 selection criteria based on the consistency of, first, the correlation with *PGC1A* expression and second,  
95 the expression of each individual candidate in seven publicly available PCa datasets (7, 9-13) (Figure  
96 1 A). We selected those candidates whose expression in primary tumors correlated with *PGC1A* ( $R \geq$   
97 0.2 and p-value  $\leq 0.05$  in more than 50% of the datasets) (Supplementary Figure 1 A) and was altered  
98 when compared to normal specimens. For genes exhibiting various transcript variants, the correlation  
99 analysis was initially performed using the average signal (Supplementary Figure 1 A) and, when  
100 available (only Taylor dataset (11)), the correlation was confirmed in all the individual isoforms  
101 (Supplementary table 1). The transcription factor MITF was the sole candidate that complied with the  
102 established criteria. We observed a consistent correlation between *PGC1A* and *MITF* in four out of the  
103 seven datasets analyzed (Figure 1 B and Supplementary Figure 1 A). In addition, not only the mean  
104 expression but also the expression of the individual *MITF* isoforms were reduced in primary and  
105 metastatic PCa specimens when compared with the normal prostate tissue samples (Figure 1 C and  
106 Supplementary Figure 1 B). Taken together, our data reveals MITF as a PGC1A-associated  
107 transcription factor that is consistently downregulated in PCa.

108

### 109 **MITF exhibits tumor suppressive activity in PCa**

110 The expression profile of *MITF* in PCa, together with its direct correlation with *PGC1A*, was suggestive  
111 of a tumor suppressive activity of the transcription factor. We first examined the differential expression  
112 of the distinct mRNA isoforms of *MITF* in normal, PCa primary tumors and PCa cell lines

113 (Supplementary Fig. 2 A-C). *MITFA* was the isoform predominantly expressed in the three scenarios  
114 analyzed, and we pursued the studies further with this isoform. Next, we aimed to analyze the biological  
115 consequences of ectopic expression of *MITFA* in PC3 PCa cells. We transduced PC3 cells with a  
116 lentiviral vector containing a doxycycline-inducible cassette for the expression of *MITFA* resulting in the  
117 generation of the PC3 TRIPZ-*MITFA* cell line. The induction of *MITFA* expression (Figure 2 A and B)  
118 as well as the regulation of known target genes, including *PGC1A* (14, 15) (Supplementary Figure 2 D-  
119 E) was confirmed. We next evaluated the biological outcome of *MITFA* ectopic expression in PC3 cells  
120 and observed that its upregulation significantly reduced two-dimensional and anchorage-independent  
121 growth (Figure 2 C and D), with no effect of doxycycline treatment by itself (14). In line with its known  
122 function as an inhibitor of cell cycle progression (39), the increased expression of *MITFA* in PC3 cells  
123 resulted in a decrease in BrdU incorporation, a surrogate readout of proliferation (Figure 2 E).  
124 In order to ascertain whether the regulation of endogenous *PGC1A* (Supplementary Figure 2 E) was  
125 required for the anti-proliferative effect of *MITFA* in PC3 cells, we aim at silencing *PGC1A* by using  
126 constitutive (pLKO) expression of short hairpins against it (Supplementary Figure 2 F). Transduction  
127 with the shRNA prevented the upregulation of *PGC1A* upon *MITFA* induction (Supplementary Figure 2  
128 G) but the anti-proliferative effect of the transcription factor remained unaffected (Supplementary Figure  
129 2 H). These data suggested that the reduced proliferation induced by *MITFA* was not dependent on the  
130 regulation of endogenous *PGC1A* in PC3 cells.

131 Importantly, the overall reduction in cell proliferation induced by *MITFA* was confirmed *in vivo*. Using  
132 subcutaneous xenografts assays we observed that *MITFA* over-expression in PC3 cells  
133 (Supplementary Fig. 2 I) led to a marked reduction in the tumor volume (Supplementary Fig. 2 J) and  
134 growth rate (Figure 2 F), with no changes in angiogenesis (Supplementary Figure 2 K). Altogether these  
135 results demonstrate that *MITFA* isoform exhibits tumor suppressive activity in PCa.

136

### 137 **Candidate screening of genes mediating the tumor suppressive activity of MITF**

138 In order to decipher the molecular mechanism driving the tumor suppressive role of *MITFA* we  
139 performed gene expression profiling of both doxycycline treated and control PC3 TRIPZ-*MITFA* cells

140 and identified 101 probes that showed statistically differential signal between both conditions  
141 (Supplementary table 2). We first performed a gene enrichment analysis with those genes which  
142 displayed upregulated expression (76 genes) upon MITFA over-expression (Figure 3 A and  
143 Supplementary table 3), as the number of downregulated genes (25) was not sufficient to obtain any  
144 gene enrichment. Next, we aimed at identifying potential MITFA effectors of relevance in human PCa.  
145 To this end, we established a threshold of 1.5 fold change over MITFA non-induced cells, which resulted  
146 in 8 probes (corresponding to 6 annotated genes) upregulated upon the induction of the transcription  
147 factor (Supplementary table 2; yellow bold highlighted). We next performed correlation analysis  
148 between *MITF* and each of the 6 differentially expressed genes obtained from the microarray (Figure 3  
149 A and Supplementary Figure 3 A). The correlation analysis in PCa primary tumor specimens showed  
150 that a single gene, *Crystallin Alpha B (CRYAB)*, had a consistent correlation (in more than 50% of  
151 datasets) with *MITF*, both the mean of isoforms (Figure 3 B and Supplementary Figure 3 A) and the  
152 individual isoform A (Supplementary table 4). The *MITF-CRYAB* correlation was confirmed using an  
153 independent cohort of PCa patients from a local hospital (Basurto cohort, Supplementary Figure 3 A).  
154 Moreover, the expression of *CRYAB* either at the level of mRNA (from public datasets and Basurto  
155 cohort) and protein (from Basurto cohort) was consistently downregulated through the progression of  
156 the disease (Figure 3 C and D and Supplementary Figure 3 B-D), supporting the association of *MITF*  
157 and *CRYAB* expression in PCa.

158 The regulation of *CRYAB* expression by MITFA was further validated *in vitro* by western blot and  
159 quantitative real-time PCR (qRT-PCR) in doxycycline-treated PC3 TRIPZ-MITFA cell lines and *in vivo*  
160 by qRT-PCR in the xenograft samples (Supplementary Figure 3 E-G). *MITF* is a transcription factor that  
161 regulates gene expression through the DNA binding to E-boxes (Myc-binding sites) (19). In order to  
162 confirm the direct regulation of *CRYAB* expression by MITFA, we screened the promoter of the  
163 chaperon and performed chromatin immunoprecipitation assays in two Myc-binding sites (UCSC-  
164 Genome browser; Supplementary Figure 3 H). As predicted, upon doxycycline treatment we detected  
165 differential binding of MITFA in both regions of *CRYAB* promoter (Figure 3 E).

166 Taken together, these data presented *CRYAB* as a direct target of MITFA and the best candidate to  
167 mediate its tumor suppressive activity in PCa.

168

### 169 **CRYAB mediates the tumor suppressive activity of MITF in PCa**

170 We next studied the functional relevance of *CRYAB* for the tumor suppressive activity of MITFA in PCa.  
171 Towards this aim, we constitutively silenced the expression of *CRYAB* by RNAi using two independent  
172 short hairpin RNA (sh#1 and sh#2) in PC3 TRIPZ-MITFA cells. After validation that RNAi was achieved  
173 (Figure 4 A and Supplementary Figure 4 A-C) the tumor suppressive activity of MITFA was monitored  
174 in control and *CRYAB*-silenced conditions (PC3 TRIPZ-MITFA scr, sh#1 or sh#2 cell lines). *CRYAB*  
175 silencing blunted the anti-proliferative effects of MITFA *in vitro* in two-dimensional and anchorage  
176 independent growth when compared with scramble shRNA (Figure 4 B and C). Moreover, the reduction  
177 in BrdU induced by MITFA was prevented when *CRYAB* was silenced (Figure 4 D). Importantly, the  
178 requirement of *CRYAB* for the tumor suppressive activity of MITFA was corroborated *in vivo* (Figure 4  
179 E and Supplementary Figure 4 D-F). The *in vitro* and *in vivo* data demonstrate that the induction of  
180 *CRYAB* is a major effector involved in the tumor suppressive activity of the transcription factor MITF in  
181 PCa.

182 We next asked whether the functional association between MITF and *CRYAB* could be employed to  
183 identify PCa patients with high disease aggressiveness. We thus ascertained the stratification potential  
184 of the MITF-*CRYAB* axis in PCa by means of consistency and robustness. We download the mRNA  
185 expression raw data together with the clinical data (recurrence or not recurrence) from Taylor (11),  
186 Glinsky (8) and TCGA (7) datasets. The individual or average expression signal of *CRYAB* and *MITF*  
187 genes was calculated for each patient in each dataset. Patients were separated by quartiles according  
188 to the individual or average signal of *CRYAB* and *MITF* genes and then Kaplan-Meier survival curves  
189 were plotted comparing patients with low expression (Quartile 1 – (Q1)) of the individual genes or the  
190 gene combination (*CRYAB* and *MITF*) *versus* the rest of the cohort (Q2+Q3+Q4). Strikingly, the  
191 signature formed by the average signal of *MITF* and *CRYAB* outperformed the prognostic potential of



192 each individual gene, strongly suggesting that the pathway described herein is strongly associated to  
193 PCa aggressiveness (Figure 4 F and Supplementary Figure 5).

194 Our data provide solid evidence of an unprecedented MITFA-CRYAB transcriptional axis that exerts  
195 tumor suppressive activity in PCa and could positively contribute to disease prognosis.

196

## 197 **DISCUSSION**

198 Technological advances in the molecular understanding of cancer have led to a paradigmatic change  
199 in the way that we combat the disease. We are now able to deconstruct a tumor at a molecular level  
200 using genomics, transcriptomics, proteomics and metabolomics. This, in turn, enables us to foresee,  
201 identify and demonstrate the potential of patient stratification. Specifically, the transcriptomics  
202 characterization of tumors is an invaluable strategy to identify clinically relevant genes that play key  
203 roles in the progression of cancer, especially for those types with poorer prognosis (14). Thus, the  
204 comprehensive and integrative analysis of gene expression changes and clinical parameters in cancer  
205 has become a mainstream in cancer research. Mining cancer-associated transcriptome datasets is an  
206 emerging approach used by top cancer research groups, but better tools are needed to increase its  
207 power and user-friendliness. In order to face this challenge, new interfaces to exploit OMICs data, such  
208 as cBioportal (40, 41) are being designed to help scientists interrogate, integrate and visualize large  
209 amount of information contained on multiple credible and qualified cancer datasets.

210 In the present study, we exploited publicly available and well-annotated (transcriptomics and clinical  
211 data) prostate cancer databases together with experimental assays to describe a novel tumor  
212 suppressive activity of the transcription factor MITF in PCa, which is executed, at least in part, through  
213 the direct regulation of the CRYAB expression.

214 The functional implication of MITF in cancer has been best defined in melanoma, in which the  
215 expression of the transcription factor is heterogeneous. Although some controversy exists regarding its  
216 oncogenic role in melanoma, MITF has been defined as a “lineage survival oncogene” with no data  
217 pointing out at a tumor suppressive function (19, 21, 39, 42-45). Even though the expression of MITF

218 has been detected in other cancer types (23, 24, 46), no data supporting a functional role of MITF  
219 deregulation has been reported yet in a cancer scenario different from melanoma.

220 Here we show that MITF is downregulated in PCa when compared with normal specimens, in contrast  
221 to the elevated expression reported in hepatocellular carcinoma (HCC) and chronic myeloid leukemia  
222 (CML) (23, 46). Moreover, the novelty of our study relies on the observation and definition of the tumor  
223 suppressive activity of MITF in PCa. In this context, MITFA upregulation was associated with a reduction  
224 in cell proliferation and DNA replication. As occurs in melanoma, the modulation of MITF expression in  
225 PCa cells induces the expression of the cell cycle inhibitor p21 but no changes in the cell cycle inhibitor  
226 p16 were observed (data not shown). Thus, our results in PCa are in line with the canonical function of  
227 MITF in cell cycle progression and proliferation in melanoma (39, 44, 45).

228 It's important to highlight that the tissue specific differences in MITF expression among different cancer  
229 types suggest that in order to fully comprehend MITF's role in cancer, its expression and function has  
230 to be analyzed in context of each particular cell and tissue type.

231 CRYAB is a member of the small heat shock protein family that functions as stress-induced molecular  
232 chaperone. It inhibits the aggregation of denatured proteins, promotes cell survival and inhibits  
233 apoptosis in the context of cancer (47). Paradoxically, CRYAB is highly expressed in some cancer types  
234 but decreased in others and in both scenarios an association with cancer progression and prognosis  
235 has been reported (25, 26, 28-32, 48-52). In spite of the amount of information regarding the changes  
236 in CRYAB expression in cancer, the transcriptional regulation of this chaperone has been poorly  
237 explored (48). In this study, we described a novel direct transcriptional regulation of CRYAB by MITF.  
238 Although there is no direct nor mechanistic evidence of the MITF-CRYAB transcriptional axis in other  
239 cancer types, in melanoma both MITF and CRYAB expression are upregulated by BRAF/MEK-inhibitor  
240 treatments (49, 52), suggesting that this regulation can go beyond both prostate cancer scenario.  
241 Indeed, we observed that the correlation between MITF and CRYAB is also present in colorectal cancer,  
242 but not in breast nor lung cancer (data not shown).

243 In our study, the MITF-CRYAB transcriptional axis is reduced and exerts tumor suppressive activity in  
244 PCa. This is in agreement with the reduced expression of CRYAB observed in PCa patients and its  
245 previous consideration as a protective gene against PCa (32). Yet, the exact molecular mechanism  
246 underlying the tumor suppressive activity of CRYAB remains to be elucidated.

247 Importantly, the extensive interrogation of PCa transcriptomes and associated clinical data has led us  
248 to propose the transcriptional axis MITF-CRYAB as a potential prognostic biomarker in PCa. The  
249 individual expression of CRYAB and MITF has been previously associated with poor prognosis in  
250 various tumor types (26, 29-31, 50, 51) and to therapy response in melanoma (53-55). However, our  
251 data showing enhanced prognostic potential of the combined signature provides a new and exciting  
252 perspective of the functional interaction of these genes in PCa.

253 Our study endorses the potential of transcriptional deregulation analysis, as either a cause or a  
254 consequence of cancer, and its impact to support the discovery of novel cancer related genes and long-  
255 term development of novel cancer treatment strategies.

## 256 **ACKNOWLEDGMENTS**

257 Apologies to those whose related publications were not cited due to space limitations. The work of  
258 V.Torrano is funded by Fundación Vasca de Innovación e Investigación Sanitarias, BIOEF  
259 (BIO15/CA/052), the AECC J.P. Bizkaia and the Basque Department of Health (2016111109). The work  
260 of A. Carracedo is supported by the Basque Department of Industry, Tourism and Trade (Eortek) and  
261 the department of education (IKERTALDE IT1106-16, also participated by A. Gomez-Muñoz), the BBVA  
262 foundation, the MINECO (SAF2016-79381-R (FEDER/EU); Severo Ochoa Excellence Accreditation  
263 SEV-2016-0644) and the European Research Council (Starting Grant 336343, PoC 754627).  
264 CIBERONC was co-funded with FEDER funds. The work of M. Graupera is supported by the MINECO  
265 (SAF2014-59950-P). The work of A. Aransay is supported by the Basque Department of Industry,  
266 Tourism and Trade (Eortek and Elkartek Programs), the Innovation Technology Department of Bizkaia  
267 County, CIBERehd Network and Spanish MINECO the Severo Ochoa Excellence Accreditation (SEV-  
268 2016-0644). R. Barrio acknowledges Spanish MINECO (BFU2014-52282-P, Consolider BFU2014-

269 57703-REDC), the Departments of Education and Industry of the Basque Government (PI2012/42) and  
270 the Bizkaia County. J. Starková acknowledges the Ministry of Health of Czech Republic AZV NV15-  
271 28848A. We are thankful to the Basque Biobank for Research (BIOEF) for the custody and  
272 management of human prostate specimens used in this study.

273

## 274 **MATERIALS AND METHODS**

### 275 **Cell culture and Reagents**

276 Human prostate carcinoma cell lines (PC3) were purchased from Leibniz-Institut DSMZ - Deutsche  
277 Sammlung von Mikroorganismen und Zellkulturen GmbH, who provided authentication certificate. The  
278 cell line used in this study was not found in the database of commonly misidentified cell lines maintained  
279 by ICLAC and NCBI Biosample. Cells were transduced with a modified TRIPZ (Dharmacon) doxycycline  
280 inducible lentiviral construct in which the RFP and miR30 region was substituted by *HA-Flag-MITF*.  
281 Lentiviral shRNA constructs targeting *PGC1A* (#1-TRCN0000001165 and #2-TRCN0000001166) and  
282 *CRYAB* (#1-TRCN0000010822 and #2-TRCN0000010823) were purchased in Sigma and a scramble  
283 shRNA (hairpin sequence:  
284 CCGGCAACAAGATGAAGAGCACCAACTCGAGTTGGTGCTCTTCATCTTGTTG) was used as  
285 control. For *PGC1A* and *CRYAB* shRNAs, Puromycin resistance cassette was replaced by Hygromycin  
286 cassette from pLKO.1 Hygro (Addgene Ref. 24150) using *Bam*HI and *Kpn*I sites. Cell lines were  
287 routinely monitored for mycoplasma contamination and quarantined while treated if positive.  
288 Doxycycline hyclate (Dox) and Puromycin were purchased from Sigma, and Hygromycin from  
289 Invitrogen.

### 290 **Xenotransplant assays**

291 All mouse experiments were carried out following the ethical guidelines established by the Biosafety  
292 and Welfare Committee at CIC bioGUNE. The procedures employed were carried out following the  
293 recommendations from AAALAC. Xenograft experiments were performed as previously described (14),

294 injecting  $10^6$  cells per condition in two flanks per mouse (Nu/Nu immunodeficient males; 6-12 weeks of  
295 age). PC3 TRIPZ-HA-MITFA cells alone or under *CRYAB* silencing were injected in each flank of nude  
296 mice and 24 h post-injections mice were fed with chow or doxycycline diet (Research diets,  
297 D12100402).

### 298 **Patient samples**

299 All samples were obtained from the Basque Biobank for research (BIOEF, Basurto University hospital)  
300 upon informed consent and with evaluation and approval from the corresponding ethics committee  
301 (CEIC code OHEUN11-12 and OHEUN14-14).

### 302 **Molecular assays**

303 Western blot was performed as previously described (14). Antibodies used: HA-Tag (Cell Signalling  
304 #3724; dilution 1:10000) ; MITF (Thermo Fisher Scientific MA5-14146; dilution 1:1000);  $\beta$ -Actin (Cell  
305 Signalling #3700; dilution 1:2000); GAPDH (clone 14C10; Cell Signalling #2218; dilution 1:1000);  
306 *CRYAB* (Cell Signalling #45844s; dilution 1:1000).

307 RNA was extracted using NucleoSpin® RNA isolation kit from Macherey-Nagel (ref: 740955.240C). For  
308 patients and animal tissues a Trizol-based implementation of the NucleoSpin® RNA isolation kit  
309 protocol was used as reported (14). 1 $\mu$ g of total RNA was used for cDNA synthesis using Maxima™ H  
310 Minus cDNA Synthesis Master Mix (Invitrogen M1682). Quantitative Real Time PCR (qRT-PCR) was  
311 performed as previously described (14). Universal Probe Library (Roche) primers and probes employed  
312 are detailed in Supplementary Table 5. *GAPDH* (Hs02758991\_g1) housekeeping assay from Applied  
313 Biosystems was used for data normalization.

314 For transcriptomic analysis in PC3 TRIPZ-HA-Flag-MITFA cells, Illumina whole genome -HumanHT-  
315 12\_V4.0 (DirHyb, nt) method was used as reported (14). A hypergeometric test was used to detect  
316 enriched dataset categories.

### 317 **Cellular assays**

318 Cell number quantification with crystal violet was performed as referenced (14).

319 For starvation experiments 100,000 cells per well were seeded in a 6-well plate. Cells were initially  
320 plated in 10% FBS media for 24 hours and then the media was changed to FBS free media and left  
321 overnight.

322 Soft agar assays were performed as previously described (14), seeding 5,000 cells per well in 6-well  
323 plates.

324 For BrDu incorporation, cells were seeded on glass cover slips in 12-well plates and after 4 days, cells  
325 were incubated with 3  $\mu\text{g mL}^{-1}$  BrDu (Sigma B5002). Cells were fixed with 4% para-formaldehyde,  
326 permeabilized with 1% Triton X-100 and incubated with a monoclonal anti-BrDu (MoBU-1) antibody  
327 (Invitrogen B35128) at a 1:100 dilution. Images were obtained with an Axiolmager D1 microscope  
328 (Zeiss). At least three different areas per cover slip were quantified.

### 329 **Chromatin Immunoprecipitation**

330 Chromatin Immunoprecipitation (ChIP) was performed using the SimpleChIP<sup>®</sup> Enzymatic Chromatin IP  
331 Kit (Cat: 9003, Cell Signalling Technology, Inc). Four million PC3 cells were grown in 150 mm dishes  
332 either with or without 0.5  $\mu\text{g mL}^{-1}$  doxycycline during 3 days. Cells from three 150 mm dishes were  
333 cross-linked with 35% formaldehyde for 10 min at room temperature. Glycine was added to dishes  
334 during 5 min at room temperature. Cells were then washed twice with ice-cold PBS, and scraped into  
335 PBS+PMSF. Pelleted cells were lysed and nuclei were harvested following manufacturer's instructions.  
336 Nuclear lysates were digested with micrococcal nuclease for 20 min at 37°C and then sonicated in  
337 500 $\mu\text{l}$  aliquots on ice for 6 pulses of 20 s using a Branson sonicator. Cells were held on ice for at least  
338 1 min between sonications. Lysates were clarified at 11,000  $\times$  g for 10 min at 4°C, and chromatin was  
339 stored at -80°C. HA-Tag polyclonal antibody (Cat: C29F4, Cell Signalling Technology) and IgG antibody  
340 (Cat: 2729, Cell Signalling Technology, Inc), were incubated overnight (4°C) with rotation and protein  
341 G magnetic beads were incubated 2hrs (4°C). Washes and elution of chromatin were performed  
342 following manufacturer's instructions. DNA quantification was carried out using a Viia7 Real-Time PCR  
343 System (Applied Biosystems) with SybrGreen reagents and primers that amplify the predicted MITFA  
344 binding region to *CRYAB* (region 1; For: ttgtttcctcgtagggcttg, Rev: tttagagccaggagagagc- region 2;

345 For: tctggaatggtgatgctcagg, Rev: attgggtgtggacagaaagc) and *ANGPTL4* (For: gttgaccggctcacaat, Rev:  
346 ggaacagctcctggcaatc) as a negative binding control.

### 347 **Whole genome gene expression characterization**

348 Whole genome expression characterization was conducted using Human HT12 v4 BeadChips (Illumina  
349 Inc.). In brief, cRNA synthesis was obtained with TargetAmp™ Nano-g™ Biotin-aRNA Labeling Kit for  
350 the Illumina® System, Epicentre (Cat.Num. TAN07924) and subsequent amplification, labeling and  
351 hybridization were performed according to Whole-Genome Gene Expression Direct Hybridization  
352 Illumina Inc.'s protocol. Raw data were extracted with GenomeStudio analysis software (Illumina Inc.)  
353 in the form of GenomeStudio's Final Report (sample probe profile).

### 354 **Bioinformatic analysis and statistics**

355 Database normalization: All the datasets used for the data mining analysis were downloaded from GEO  
356 and TCGA. GEO-downloaded data was subjected to background correction,  $\log_2$  transformation and  
357 quartile normalization. In the case of using a pre-processed dataset, this normalization was reviewed  
358 and corrected if required. TCGA data were downloaded as upper quartile normalized RSEM count,  
359 which was been  $\log_2$  transformed.

360 Quartile analysis in Disease Free Survival: Patients biopsies from primary tumours were organized into  
361 four quartiles according to the expression of the gene of interest in three datasets. The recurrence of  
362 the disease was selected as the event of interest. Kaplan-Meier estimator was used to perform the test  
363 as it takes into account *right-censoring*, which occurs if a patient withdraws from a study. On the plot,  
364 small vertical tick-marks indicate losses, where a patient's survival time has been right-censored. With  
365 this estimator we obtained a survival curve, a graphical representation of the occurrence of the event  
366 in the different groups, and a p-value that estimates the statistical power of the differences observed.

367 Correlation analysis: Spearman correlation test was applied to analyse the relationship between paired  
368 genes. From this analysis, Spearman coefficient (R) indicates the existing linear correlation  
369 (dependence) between two variables *X* and *Y*, giving a value between +1 and -1 (both included), where

370 1 is total positive correlation, 0 is no correlation, and  $-1$  is total negative correlation. The p-value  
371 indicates the significance of this R coefficient.

372 Statistical analysis: No statistical method was used to predetermine sample size. The experiments were  
373 not randomized. The investigators were not blinded to allocation during experiments and outcome  
374 assessment. Unless otherwise stated, data analysed by parametric tests is represented by the mean  $\pm$   
375 s.e.m. of pooled experiments and median  $\pm$  interquartile range for experiments analysed by non-  
376 parametric tests. n values represent the number of independent experiments performed, the number of  
377 individual mice or patient specimens. For each independent *in vitro* experiment, at least two technical  
378 replicates were used and a minimum number of three experiments were done to ensure adequate  
379 statistical power. For data mining analysis, ANOVA test was used for multi-component comparisons  
380 and Student T test for two component comparisons. In the *in vitro* experiments, normal distribution was  
381 confirmed or assumed (for  $n < 5$ ) and Student T test was applied for two component comparisons. In the  
382 statistical analyses involving fold changes, one sample t-test with a hypothetical value of 1 was  
383 performed. The confidence level used for all the statistical analyses was of 95% (alpha value = 0.05).  
384 Two-tail statistical analysis was applied for experimental design without predicted result, and one-tail  
385 for validation or hypothesis-driven experiments.

386 Gene expression array data analysis: first, raw expression data were background-corrected, log<sub>2</sub>-  
387 transformed and quantile-normalized using the lumi R package<sup>7</sup>

388 , available through the Bioconductor repository. Probes with a “detection p-value” lower than 0.01 in at  
389 least one sample were considered expressed. For the detection of differentially expressed genes, a  
390 linear model was fitted to the probe data and empirical Bayes moderated t-statistics were calculated  
391 using the limma package from Bioconductor. Only genes with differential fold-change (FC)  $> 1.5$  or  $< -$   
392  $1.5$  and an adjusted p-value  $< 0.05$  were considered as differentially expressed.

393 **Accession numbers and datasets**



394 Primary accessions: The transcriptomic data generated in this publication have been deposited in  
395 NCBI's Gene Expression Omnibus and are accessible through GEO Series accession number  
396 GSE114345 (<https://www.ncbi.nlm.nih.gov/geo/query/acc.cgi?acc=GSE114345>).

397 Referenced accessions: TCGA <https://cancergenome.nih.gov/>, Grasso *et al.*, GEO: GSE35988 (9);  
398 Lapointe *et al.*, GEO: GSE3933 (10); Taylor *et al.*, GEO: GSE21032 (11); Tomlins *et al.*, GEO:  
399 GSE6099 (12); Varambally *et al.*, GEO: GSE3325 (13); and Glinsky *et al.* (8).

400 **AUTHOR CONTRIBUTIONS**

401 LV-J and AM performed the majority of *in vitro* and *in vivo* experiments, unless specified  
402 otherwise. NM-M contributed to the *in vivo* experiments, experimental design and  
403 discussion. ARC carried out the bioinformatics and biostatistical analysis. AS-C, MP-V,  
404 IH and IA contributed to *in vitro* analysis and provided technical support. IL-V, AS-M, AL-  
405 I and MU-U provided BPH and PCa samples for gene expression analysis from Basurto  
406 University Hospital. MGr carried out microvessel staining and quantifications. JS  
407 contributed as supervisor of IH. JDS and RB performed or coordinated (RB) the cloning  
408 of *MITFA* in lentiviral vectors. AMMA contributed to experimental design and discussion.  
409 AC contributed to experimental design, data analysis and discussion. VT supervised the  
410 project, contributed to the experimental design, data generation, analysis and discussion  
411 and wrote the manuscript.

412

## 413 REFERENCES

- 414 1. Hanahan D, Weinberg RA. Hallmarks of cancer: the next generation. *Cell*.  
415 2011;144(5):646-74.
- 416 2. Martin-Martin N, Carracedo A, Torrano V. Metabolism and Transcription in Cancer:  
417 Merging Two Classic Tales. *Front Cell Dev Biol*. 2017;5:119.
- 418 3. Martin-Martin N, Piva M, Urošević J, Aldaz P, Sutherland JD, Fernandez-Ruiz S, et al.  
419 Stratification and therapeutic potential of PML in metastatic breast cancer. *Nat Commun*.  
420 2016;7:12595.
- 421 4. Martin-Martin N, Zabala-Letona A, Fernandez-Ruiz S, Arreal L, Camacho L, Castillo-  
422 Martin M, et al. PPARdelta Elicits Ligand-Independent Repression of Trefoil Factor Family to Limit  
423 Prostate Cancer Growth. *Cancer Res*. 2018;78(2):399-409.
- 424 5. Bacolod MD, Das SK, Sokhi UK, Bradley S, Fenstermacher DA, Pellicchia M, et al.  
425 Examination of Epigenetic and other Molecular Factors Associated with mda-9/Syntenin  
426 Dysregulation in Cancer Through Integrated Analyses of Public Genomic Datasets. *Adv Cancer*  
427 *Res*. 2015;127:49-121.
- 428 6. Olvedy M, Tisserand JC, Luciani F, Boeckx B, Wouters J, Lopez S, et al. Comparative  
429 oncogenomics identifies tyrosine kinase FES as a tumor suppressor in melanoma. *J Clin Invest*.  
430 2017;127(6):2310-25.
- 431 7. Cancer Genome Atlas Research N. The Molecular Taxonomy of Primary Prostate Cancer.  
432 *Cell*. 2015;163(4):1011-25.
- 433 8. Glinsky GV, Glinskii AB, Stephenson AJ, Hoffman RM, Gerald WL. Gene expression  
434 profiling predicts clinical outcome of prostate cancer. *J Clin Invest*. 2004;113(6):913-23.
- 435 9. Grasso CS, Wu YM, Robinson DR, Cao X, Dhanasekaran SM, Khan AP, et al. The  
436 mutational landscape of lethal castration-resistant prostate cancer. *Nature*.  
437 2012;487(7406):239-43.
- 438 10. Lapointe J, Li C, Giacomini CP, Salari K, Huang S, Wang P, et al. Genomic profiling reveals  
439 alternative genetic pathways of prostate tumorigenesis. *Cancer Res*. 2007;67(18):8504-10.
- 440 11. Taylor BS, Schultz N, Hieronymus H, Gopalan A, Xiao Y, Carver BS, et al. Integrative  
441 genomic profiling of human prostate cancer. *Cancer Cell*. 2010;18(1):11-22.
- 442 12. Tomlins SA, Mehra R, Rhodes DR, Cao X, Wang L, Dhanasekaran SM, et al. Integrative  
443 molecular concept modeling of prostate cancer progression. *Nat Genet*. 2007;39(1):41-51.
- 444 13. Varambally S, Yu J, Laxman B, Rhodes DR, Mehra R, Tomlins SA, et al. Integrative genomic  
445 and proteomic analysis of prostate cancer reveals signatures of metastatic progression. *Cancer*  
446 *Cell*. 2005;8(5):393-406.
- 447 14. Torrano V, Valcarcel-Jimenez L, Cortazar AR, Liu X, Urošević J, Castillo-Martin M, et al.  
448 The metabolic co-regulator PGC1alpha suppresses prostate cancer metastasis. *Nat Cell Biol*.  
449 2016;18(6):645-56.
- 450 15. Valcarcel-Jimenez L, Torrano V, Carracedo A. New insights on prostate cancer  
451 progression. *Cell Cycle*. 2017;16(1):13-4.
- 452 16. Valcarcel-Jimenez L, Gaude E, Torrano V, Frezza C, Carracedo A. Mitochondrial  
453 Metabolism: Yin and Yang for Tumor Progression. *Trends Endocrinol Metab*. 2017;28(10):748-  
454 57.
- 455 17. Hock MB, Kralli A. Transcriptional control of mitochondrial biogenesis and function.  
456 *Annu Rev Physiol*. 2009;71:177-203.
- 457 18. Haq R, Shoag J, Andreu-Perez P, Yokoyama S, Edelman H, Rowe GC, et al. Oncogenic  
458 BRAF regulates oxidative metabolism via PGC1alpha and MITF. *Cancer Cell*. 2013;23(3):302-15.
- 459 19. Wellbrock C, Arozarena I. Microphthalmia-associated transcription factor in melanoma  
460 development and MAP-kinase pathway targeted therapy. *Pigment Cell Melanoma Res*.  
461 2015;28(4):390-406.

- 462 20. Tachibana M. MITF: a stream flowing for pigment cells. *Pigment Cell Res.*  
463 2000;13(4):230-40.
- 464 21. Garraway LA, Widlund HR, Rubin MA, Getz G, Berger AJ, Ramaswamy S, et al. Integrative  
465 genomic analyses identify MITF as a lineage survival oncogene amplified in malignant  
466 melanoma. *Nature.* 2005;436(7047):117-22.
- 467 22. Vazquez F, Lim JH, Chim H, Bhalla K, Girnun G, Pierce K, et al. PGC1alpha expression  
468 defines a subset of human melanoma tumors with increased mitochondrial capacity and  
469 resistance to oxidative stress. *Cancer Cell.* 2013;23(3):287-301.
- 470 23. Aggoune D, Sorel N, Bonnet ML, Goujon JM, Tarte K, Herault O, et al. Bone marrow  
471 mesenchymal stromal cell (MSC) gene profiling in chronic myeloid leukemia (CML) patients at  
472 diagnosis and in deep molecular response induced by tyrosine kinase inhibitors (TKIs). *Leuk Res.*  
473 2017;60:94-102.
- 474 24. Li Y, Kong D, Ahmad A, Bao B, Sarkar FH. Targeting bone remodeling by isoflavone and  
475 3,3'-diindolylmethane in the context of prostate cancer bone metastasis. *PLoS One.*  
476 2012;7(3):e33011.
- 477 25. Moyano JV, Evans JR, Chen F, Lu M, Werner ME, Yehiely F, et al. AlphaB-crystallin is a  
478 novel oncoprotein that predicts poor clinical outcome in breast cancer. *J Clin Invest.*  
479 2006;116(1):261-70.
- 480 26. Voduc KD, Nielsen TO, Perou CM, Harrell JC, Fan C, Kennecke H, et al. alphaB-crystallin  
481 Expression in Breast Cancer is Associated with Brain Metastasis. *NPJ Breast Cancer.* 2015;1.
- 482 27. Shi C, Yang X, Bu X, Hou N, Chen P. Alpha B-crystallin promotes the invasion and  
483 metastasis of colorectal cancer via epithelial-mesenchymal transition. *Biochem Biophys Res*  
484 *Commun.* 2017;489(4):369-74.
- 485 28. Yilmaz M, Karatas OF, Yuceturk B, Dag H, Yener M, Ozen M. Alpha-B-crystallin expression  
486 in human laryngeal squamous cell carcinoma tissues. *Head Neck.* 2015;37(9):1344-8.
- 487 29. Volkmann J, Reuning U, Rudelius M, Hafner N, Schuster T, Becker VRA, et al. High  
488 expression of crystallin alphaB represents an independent molecular marker for unfavourable  
489 ovarian cancer patient outcome and impairs TRAIL- and cisplatin-induced apoptosis in human  
490 ovarian cancer cells. *Int J Cancer.* 2013;132(12):2820-32.
- 491 30. Qin H, Ni Y, Tong J, Zhao J, Zhou X, Cai W, et al. Elevated expression of CRYAB predicts  
492 unfavorable prognosis in non-small cell lung cancer. *Med Oncol.* 2014;31(8):142.
- 493 31. Shi C, He Z, Hou N, Ni Y, Xiong L, Chen P. Alpha B-crystallin correlates with poor survival  
494 in colorectal cancer. *Int J Clin Exp Pathol.* 2014;7(9):6056-63.
- 495 32. Altintas DM, Allioli N, Decaussin M, de Bernard S, Ruffion A, Samarut J, et al.  
496 Differentially expressed androgen-regulated genes in androgen-sensitive tissues reveal  
497 potential biomarkers of early prostate cancer. *PLoS One.* 2013;8(6):e66278.
- 498 33. Huang Z, Cheng Y, Chiu PM, Cheung FM, Nicholls JM, Kwong DL, et al. Tumor suppressor  
499 Alpha B-crystallin (CRYAB) associates with the cadherin/catenin adherens junction and impairs  
500 NPC progression-associated properties. *Oncogene.* 2012;31(32):3709-20.
- 501 34. Borniquel S, Garcia-Quintans N, Valle I, Olmos Y, Wild B, Martinez-Granero F, et al.  
502 Inactivation of Foxo3a and subsequent downregulation of PGC-1 alpha mediate nitric oxide-  
503 induced endothelial cell migration. *Mol Cell Biol.* 2010;30(16):4035-44.
- 504 35. Jin J, Iakova P, Jiang Y, Lewis K, Sullivan E, Jawanmardi N, et al. Transcriptional and  
505 translational regulation of C/EBPbeta-HDAC1 protein complexes controls different levels of p53,  
506 SIRT1, and PGC1alpha proteins at the early and late stages of liver cancer. *J Biol Chem.*  
507 2013;288(20):14451-62.
- 508 36. Sancho P, Burgos-Ramos E, Tavera A, Bou Kheir T, Jagust P, Schoenhals M, et al.  
509 MYC/PGC-1alpha Balance Determines the Metabolic Phenotype and Plasticity of Pancreatic  
510 Cancer Stem Cells. *Cell Metab.* 2015;22(4):590-605.
- 511 37. Shimizu YI, Morita M, Ohmi A, Aoyagi S, Ebihara H, Tonaki D, et al. Fasting induced up-  
512 regulation of activating transcription factor 5 in mouse liver. *Life Sci.* 2009;84(25-26):894-902.

- 513 38. Wende AR, O'Neill BT, Bugger H, Riehle C, Tuinei J, Buchanan J, et al. Enhanced cardiac  
514 Akt/protein kinase B signaling contributes to pathological cardiac hypertrophy in part by  
515 impairing mitochondrial function via transcriptional repression of mitochondrion-targeted  
516 nuclear genes. *Mol Cell Biol.* 2015;35(5):831-46.
- 517 39. Carreira S, Goodall J, Aksan I, La Rocca SA, Galibert MD, Denat L, et al. Mitf cooperates  
518 with Rb1 and activates p21Cip1 expression to regulate cell cycle progression. *Nature.*  
519 2005;433(7027):764-9.
- 520 40. Cerami E, Gao J, Dogrusoz U, Gross BE, Sumer SO, Aksoy BA, et al. The cBio cancer  
521 genomics portal: an open platform for exploring multidimensional cancer genomics data. *Cancer*  
522 *Discov.* 2012;2(5):401-4.
- 523 41. Gao J, Aksoy BA, Dogrusoz U, Dresdner G, Gross B, Sumer SO, et al. Integrative analysis  
524 of complex cancer genomics and clinical profiles using the cBioPortal. *Sci Signal.* 2013;6(269):pl1.
- 525 42. Carreira S, Goodall J, Denat L, Rodriguez M, Nuciforo P, Hoek KS, et al. Mitf regulation of  
526 Dia1 controls melanoma proliferation and invasiveness. *Genes Dev.* 2006;20(24):3426-39.
- 527 43. Vachtenheim J, Ondrusova L. Microphthalmia-associated transcription factor expression  
528 levels in melanoma cells contribute to cell invasion and proliferation. *Exp Dermatol.*  
529 2015;24(7):481-4.
- 530 44. Wellbrock C, Marais R. Elevated expression of MITF counteracts B-RAF-stimulated  
531 melanocyte and melanoma cell proliferation. *J Cell Biol.* 2005;170(5):703-8.
- 532 45. Wellbrock C, Rana S, Paterson H, Pickersgill H, Brummelkamp T, Marais R. Oncogenic  
533 BRAF regulates melanoma proliferation through the lineage specific factor MITF. *PLoS One.*  
534 2008;3(7):e2734.
- 535 46. Thomaschewski M, Riecken K, Unrau L, Volz T, Cornils K, Ittrich H, et al. Multi-color RGB  
536 marking enables clonality assessment of liver tumors in a murine xenograft model. *Oncotarget.*  
537 2017;8(70):115582-95.
- 538 47. Kamradt MC, Lu M, Werner ME, Kwan T, Chen F, Strohecker A, et al. The small heat shock  
539 protein alpha B-crystallin is a novel inhibitor of TRAIL-induced apoptosis that suppresses the  
540 activation of caspase-3. *J Biol Chem.* 2005;280(12):11059-66.
- 541 48. Zhang L, Zhang L, Xia X, He S, He H, Zhao W. Kruppel-like factor 4 promotes human  
542 osteosarcoma growth and metastasis via regulating CRYAB expression. *Oncotarget.*  
543 2016;7(21):30990-1000.
- 544 49. Hu R, Aplin AE. alphaB-crystallin is mutant B-RAF regulated and contributes to cyclin D1  
545 turnover in melanocytic cells. *Pigment Cell Melanoma Res.* 2010;23(2):201-9.
- 546 50. Chin D, Boyle GM, Williams RM, Ferguson K, Pandeya N, Pedley J, et al. Alpha B-crystallin,  
547 a new independent marker for poor prognosis in head and neck cancer. *Laryngoscope.*  
548 2005;115(7):1239-42.
- 549 51. Shi QM, Luo J, Wu K, Yin M, Gu YR, Cheng XG. High level of alphaB-crystallin contributes  
550 to the progression of osteosarcoma. *Oncotarget.* 2016;7(8):9007-16.
- 551 52. Smith MP, Brunton H, Rowling EJ, Ferguson J, Arozarena I, Miskolczi Z, et al. Inhibiting  
552 Drivers of Non-mutational Drug Tolerance Is a Salvage Strategy for Targeted Melanoma Therapy.  
553 *Cancer Cell.* 2016;29(3):270-84.
- 554 53. Muller J, Krijgsman O, Tsoi J, Robert L, Hugo W, Song C, et al. Low MITF/AXL ratio predicts  
555 early resistance to multiple targeted drugs in melanoma. *Nat Commun.* 2014;5:5712.
- 556 54. Naffouje S, Naffouje R, Bhagwandin S, Salti GI. Microphthalmia transcription factor in  
557 malignant melanoma predicts occult sentinel lymph node metastases and survival. *Melanoma*  
558 *Res.* 2015;25(6):496-502.
- 559 55. Najem A, Krayem M, Sales F, Hussein N, Badran B, Robert C, et al. P53 and MITF/Bcl-2  
560 identified as key pathways in the acquired resistance of NRAS-mutant melanoma to MEK  
561 inhibition. *Eur J Cancer.* 2017;83:154-65.

562

563

## 564 **Figure legends**

565 **Figure 1. MITF expression correlates with PGC1A expression and is**  
566 **downregulated in PCa. A.** Schematic representation of candidate screening to mediate  
567 PGC1A downregulation in PCa. Candidate selection was performed by applying two  
568 different selection criteria based on the consistency within the datasets used (>50%): the  
569 expression of the candidate must be consistently (i) correlated with the PGC1A's and (ii)  
570 altered in the disease. **B.** Correlation analysis between PGC1A and MITF expression in  
571 primary tumor (PT) specimens of different PCa datasets ((9-11) and TCGA provisional).  
572 Sample sizes: Grasso n=45; Lapointe n=13; Taylor n=131 and TCGA provisional n=495.  
573 **C.** MITF expression in normal prostate and primary tumors (PT) specimens in different  
574 data sets (9-11). Correlation (B) and expression (C) data from Taylor dataset  
575 corresponds to the mean signal of all isoforms of the transcripts. In B and C, each dot  
576 corresponds to an individual specimen. Sample sizes: Grasso et al. (Normal, n=12; PT,  
577 n=45); Lapointe et al. (Normal, n=9; PT, n=13); Taylor et al. (Normal, n=29; PT, n=131).  
578 Error bars represent s.e.m. Statistic test: Spearman correlation  $R$  (B) and Mann Whitney  
579 test (C). p, p-value.

580 **Figure 2. MITF exhibits tumor suppressive activity in PC3 PCa cell line. A-B.**  
581 Analysis and quantification of MITF expression by qRT-PCR (A, n=8)) and western blot  
582 (B, representative experiment out of 3 independent ones) in PC3 TRIPZ-MITFA cells  
583 after treatment with  $0.5 \mu\text{g mL}^{-1}$  doxycycline (Dox). **C.** Relative cell number quantification  
584 by crystal violet in doxycycline treated and non-treated PC3 TRIPZ-MITFA cells. Data is  
585 normalized to day 0. Asterisks indicate statistics of 5 independent experiments. One  
586 representative experiment out of 5 is shown. Error bars represent standard deviation. **D-**  
587 **E.** Effect of MITF induction on anchorage independent growth (D, soft agar; n=4  
588 independent experiments) and BrdU incorporation (E, n=3 independent experiments). **F.**  
589 Impact of MITF induction in tumor growth rate of PC3 TRIPZ-MITFA cells (n=7 animals  
590 per group; 14 injections/tumors). No dox: MITFA non-induced conditions; Dox: MITFA

591 induced conditions. Error bars represent s.e.m (A, D and E) or minimum and maximum  
592 values (H). Statistic test: One sample t-test (A, D and E) and Student t-test (C and F. \*p  
593 < 0.05, \*\*p < 0.01, \*\*\*p < 0.001.

594 **Figure 3. CRYAB is the candidate to mediate its tumor suppressive activity in PCa.**

595 **A.** Workflow of the candidate screening. **B.** Correlation analysis between MITF and  
596 CRYAB expression in primary tumor (PT) specimens of different PCa datasets. Sample  
597 sizes: Taylor, n=131; Grasso, n=49; Lapointe, n=13; TCGA provisional data, n=495; and  
598 Glinsky, n=78. **C.** CRYAB expression in normal prostate and primary tumor (PT)  
599 specimens in different PCa datasets (9-13). Sample sizes: Taylor (N, n=29; PT, n=130);  
600 Grasso (N, n=12; PT, n=49); Varambally (N, n=6; PT, n=7); Lapointe et al. (N, n=9; PT,  
601 n=13) and Tomlins (N, n=22; PT, n=32). Data from Taylor dataset corresponds to the  
602 mean signal of all isoforms of the transcripts. In B and C, each dot corresponds to an  
603 individual specimen. **D.** Western blot analysis of CRYAB expression in benign prostatic  
604 hyperplasia (BPH) and PCa specimens from Basurto University Hospital cohort (BPH  
605 n=7 patient specimens; PCa n=14 patient specimens). **E.** Chromatin  
606 immunoprecipitation (ChIP) of exogenous MITF on CRYAB promoter in PC3 TRIPZ-  
607 MITFA cells after induction with 0.5  $\mu\text{g mL}^{-1}$  doxycycline for 3 days (n=4-5). Binding to  
608 ANGPT4 was used as a negative control. Final data was normalized to IgG (negative-  
609 immunoprecipitation control) and to No dox condition. No dox: MITFA non-induced  
610 conditions; Dox: MITFA induced conditions. Statistic tests: Spearman correlation (B);  
611 Mann Whitney test (C); one sample t test (E); Error bars represent s.e.m. \*p < 0.05, \*\*p  
612 < 0.01.

613 **Figure 4. CRYAB mediates the tumor suppressor activity of MITF. A.** Analysis of

614 MITFA and CRYAB protein expression in doxycycline-treated PC3 TRIPZ-MITFA cells  
615 transduced with shScramble (scr) or two independent shCRYAB (sh#1 and#2) (one  
616 representative experiment with technical duplicates is shown; similar results were  
617 obtained in three independent experiments). **B.** Relative cell number quantification by



618 crystal violet in doxycycline-treated and non-treated PC3 TRIPZ-MITFA cells, in the  
619 presence (scr) or absence (sh#1, 2) of CRYAB (n=5 independent experiments). Data is  
620 normalized to day 0 and represented as cell number at day 6 relative to No Dox condition  
621 (depicted by a dotted line). **C-D.** Effect of CRYAB silencing on anchorage independent  
622 growth (C, soft agar; n=4 independent experiments) and BrdU incorporation (D, n=3  
623 independent experiments) in PC3 TRIPZ-MITFA cells after treatment with 0.5  $\mu\text{g mL}^{-1}$   
624 doxycycline. **E.** Impact of CRYAB silencing in tumor growth rate of MITF-induced cells  
625 (n=10 animals per group-scr or sh#1; 2 injections per mice; (scr No dox, n=10 tumors;  
626 sh#1 No dox, n=8 tumors; scr Dox, n=6 tumors; sh#1 Dox, n=11 tumors). **F.** Association  
627 of the mean signal of MITF and CRYAB with disease-free survival (DFS) in three PCa  
628 data sets (Q1: first quartile distribution; rest: second, third and fourth quartile distribution.  
629 Sample sizes: Taylor, primary tumors n=131; TCGA provisional data primary tumors  
630 n=490; Glinsky, primary tumors n=78. No dox: MITFA non-induced conditions; Dox:  
631 MITFA induced conditions. HR: Hazard Ratio. Statistic tests: One sample t test (B, C and  
632 D – No dox vs Dox conditions); Unpaired Student *t*-test (*t*) (B, C and D – Dox-treated scr  
633 vs Dox-treated sh#1/2); Log-rank (Mantel-Cox) test (F). Error bars represent s.e.m. \*/\$  
634  $p < 0.05$ , \*\*/\$\$ $p < 0.01$ . Asterisks indicate statistic between No dox and Dox conditions  
635 and dollar symbol between Dox-treated scr and Dox-treated sh#1 or 2.

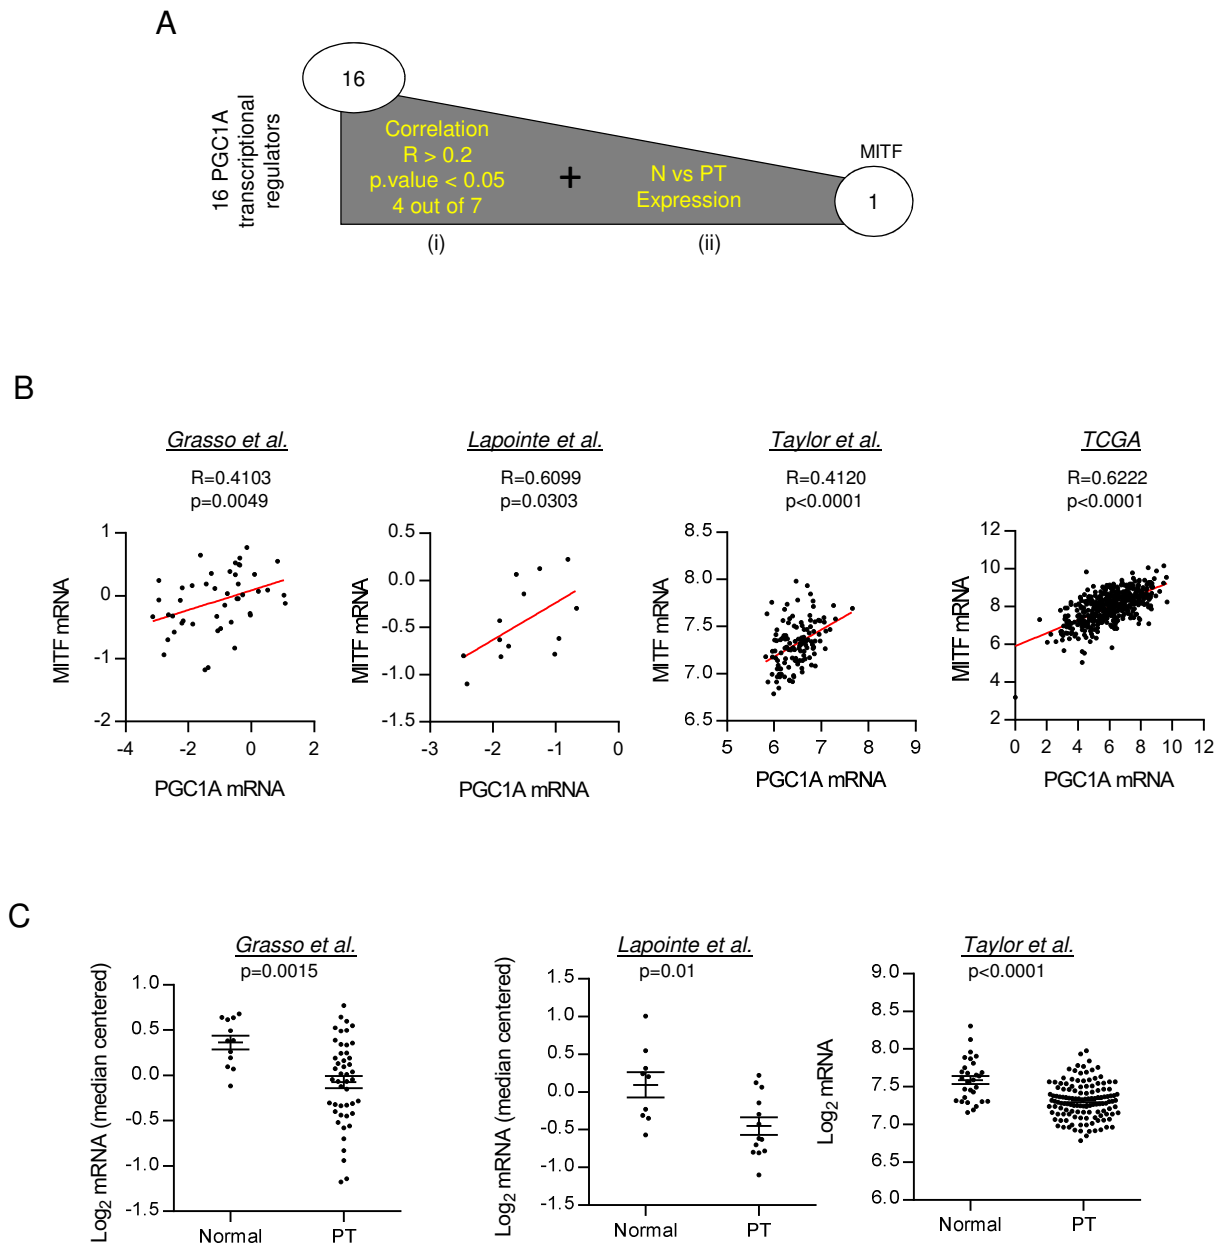

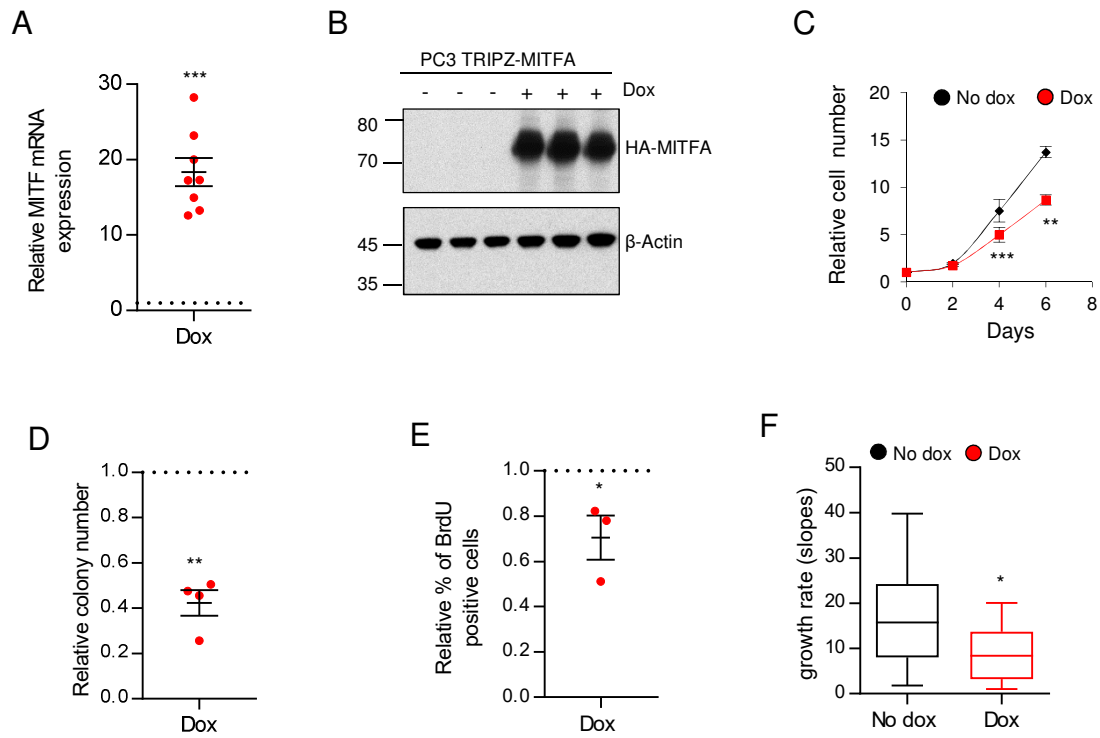

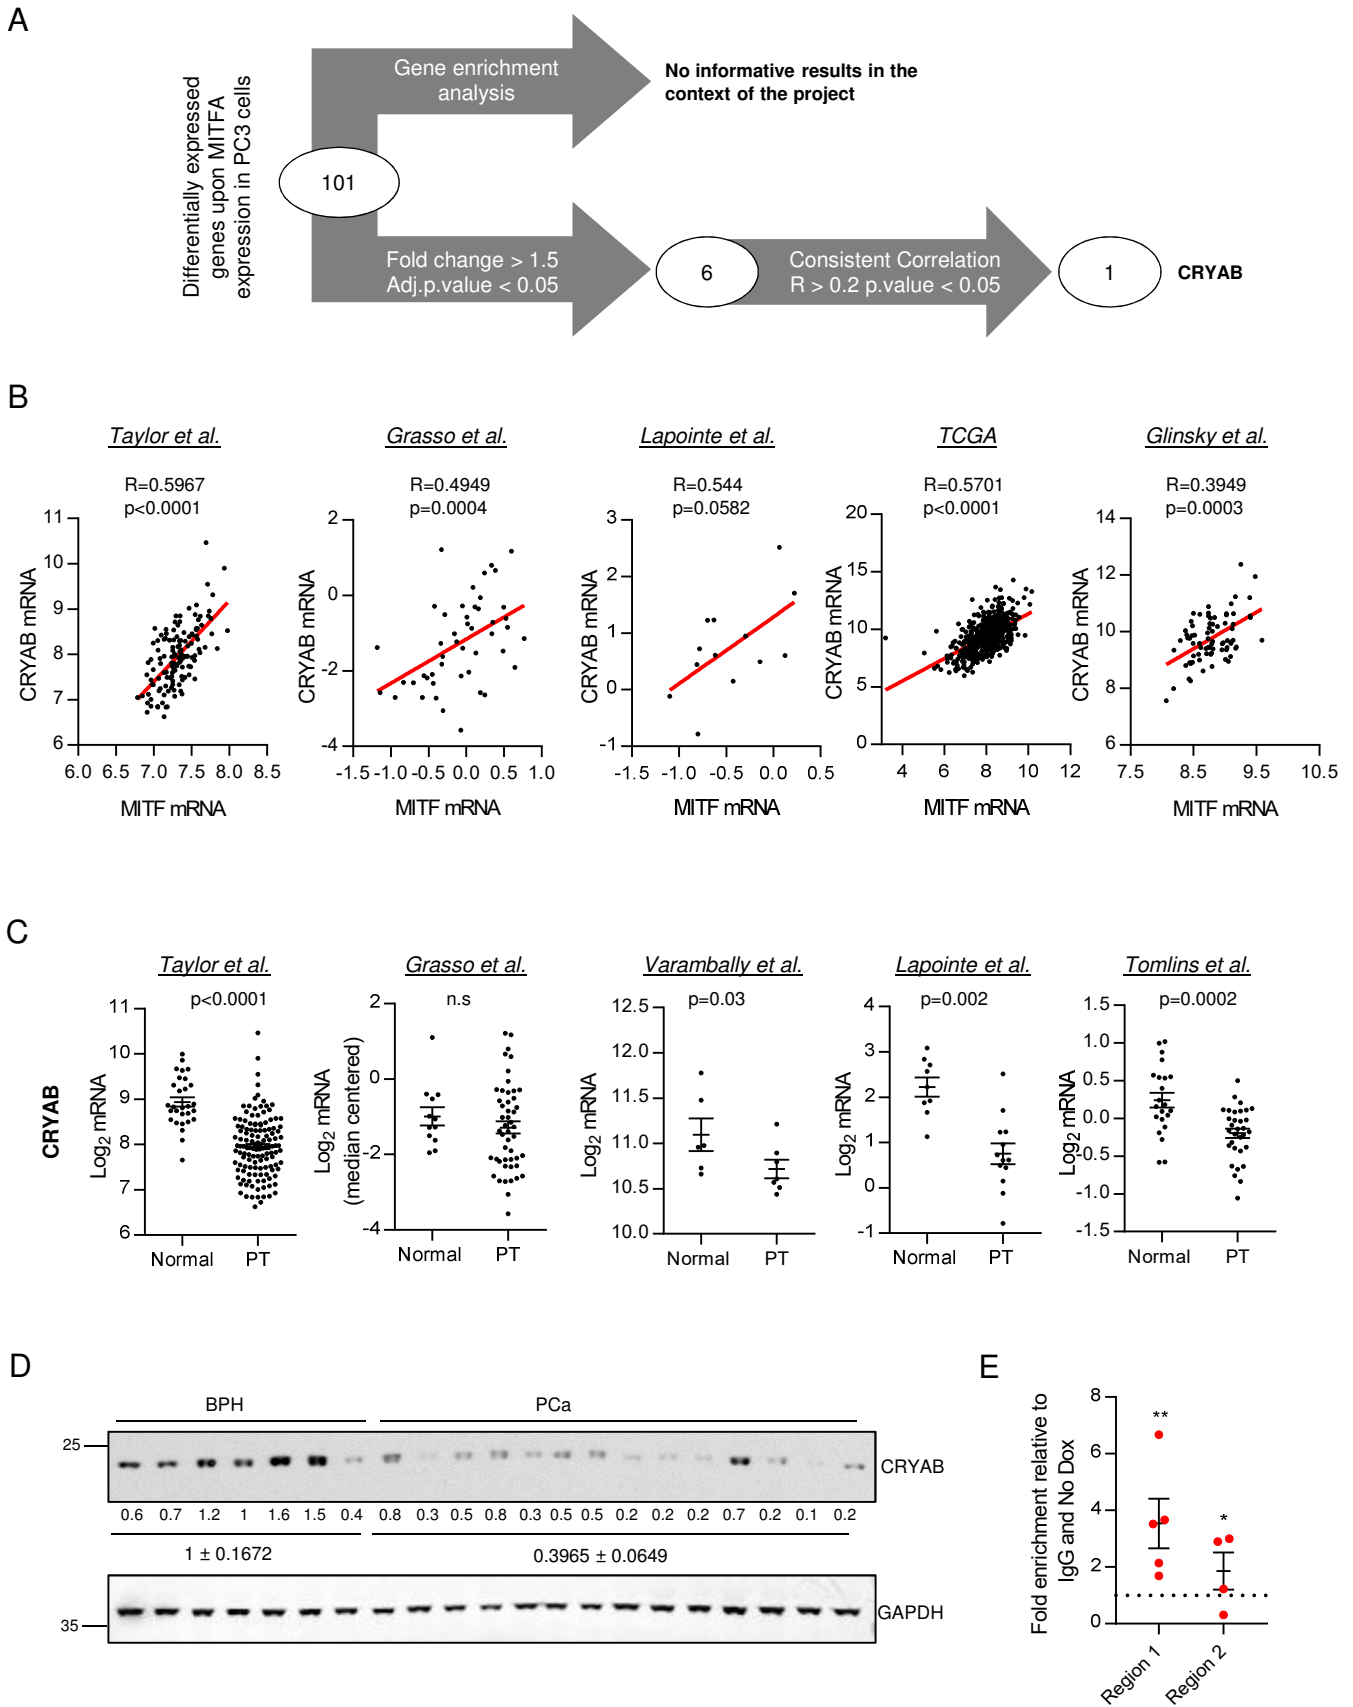

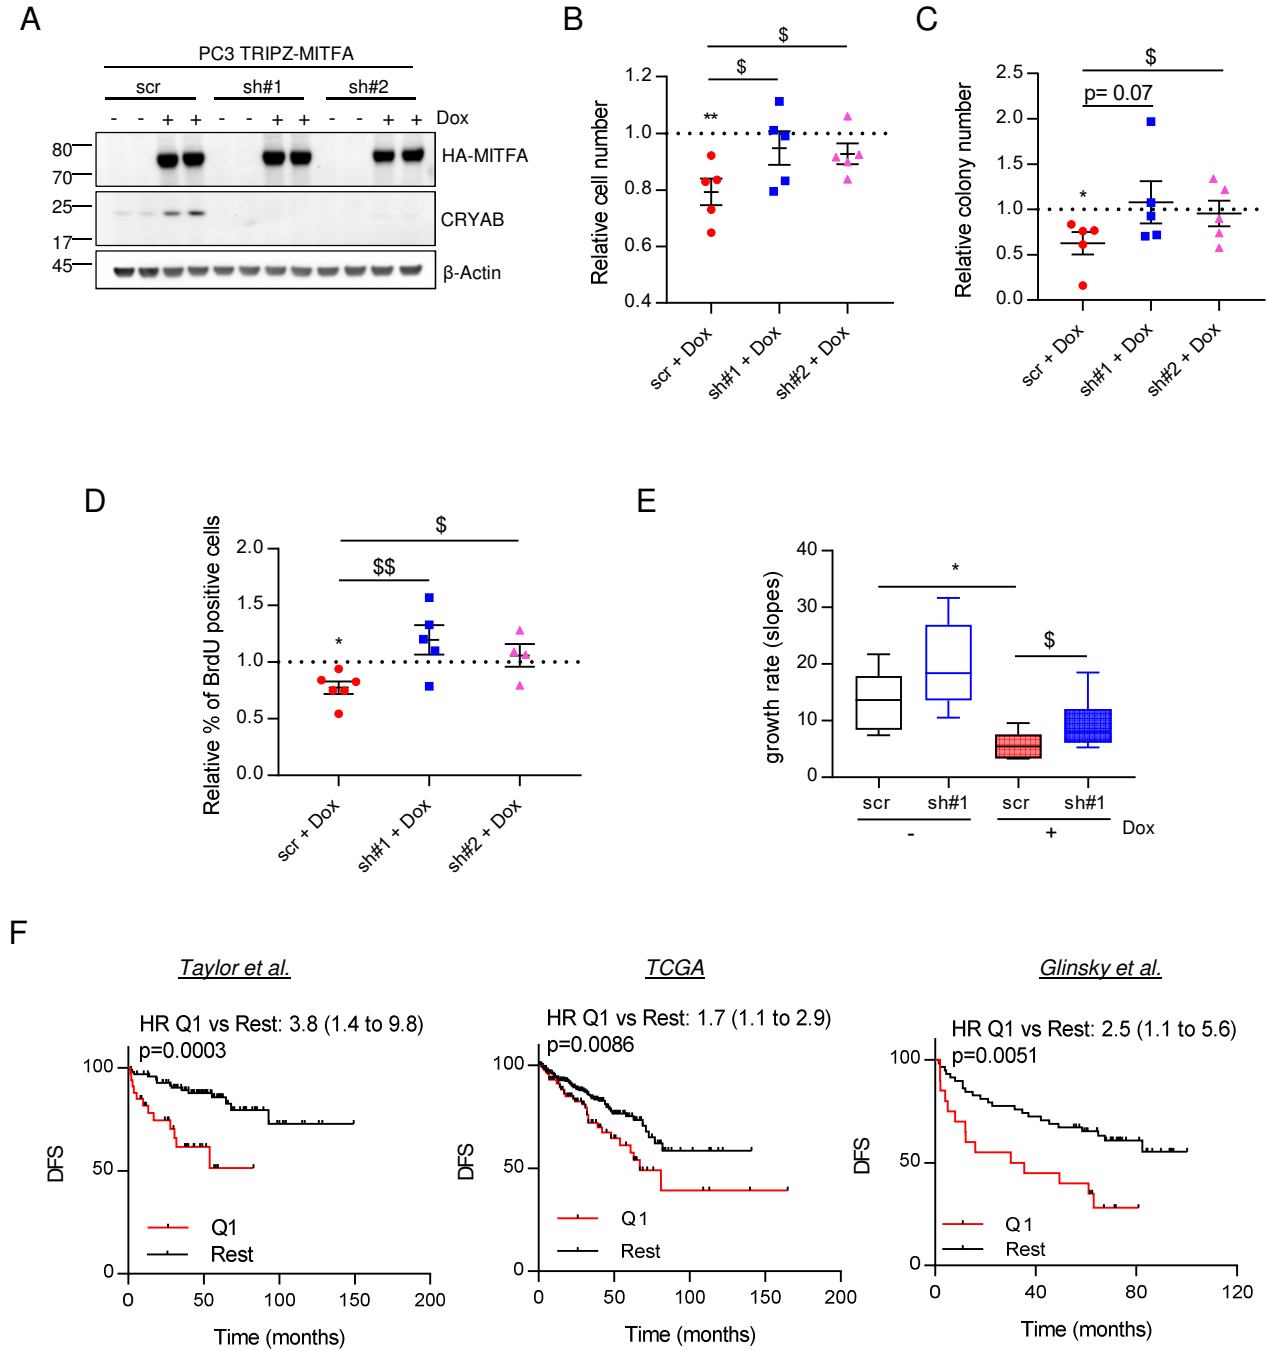

Source: http://biorxiv.org/content/10.1101/391763v1.full.pdf
